# Supplementary material for: Bark Thickness Equations for Mixed-Conifer Forest Type in Klamath and Sierra Nevada Mountains of California
Source: Hindawi journal article supplement (doi:10.1155/2016/1864039), 2016-01-01
Supplement: f1 [file 1864039.f1.pdf]

## Supplementary File

**Table S1.** Summary data for mixed-conifer sample trees at Klamath National Forest (KNF), Tahoe National Forest (TNF), and Sequoia National Forest (SNF) sites. Abbreviations: DBH (diameter at breast height), BT (bark thickness), CR (crown ratio), BLC (height to base of live crown), GR (recent DBH growth rate). Species sampled: white fir (ABCO), red fir (ABMA), incense-cedar (CADE), lodgepole pine (PICO), Jeffrey pine (PIJE), sugar pine (PILA), western white pine (PIMO), and Douglas-fir (PSME).

| Species         | Statistics | DBH (cm) | Height (m) | BT (mm) | CR (%) | BLC (m) | GR (mm yr <sup>-1</sup> ) |
|-----------------|------------|----------|------------|---------|--------|---------|---------------------------|
| ABCO<br>(n=132) | Mean       | 43.9     | 20.6       | 26.5    | 70     | 6.5     | 2.16                      |
|                 | s.d.       | 31.7     | 11.9       | 17.3    | 15     | 5.5     | 1.46                      |
|                 | Max.       | 161.4    | 59.2       | 83.5    | 95     | 25.9    | 6.82                      |
|                 | Min.       | 10.0     | 5.4        | 4.0     | 30     | 0.6     | 0.14                      |
| ABMA<br>(n=138) | Mean       | 43.6     | 20.6       | 25.2    | 71     | 6.8     | 2.54                      |
|                 | s.d.       | 28.5     | 11.6       | 16.6    | 16     | 6.3     | 1.70                      |
|                 | Max.       | 134.8    | 51.2       | 100.0   | 93     | 29.0    | 8.76                      |
|                 | Min.       | 10.2     | 4.3        | 5.5     | 27     | 0.5     | 0.22                      |
| CADE<br>(n=45)  | Mean       | 47.0     | 17.3       | 37.9    | 71     | 5.3     | 1.90                      |
|                 | s.d.       | 30.1     | 9.1        | 28.8    | 13     | 4.2     | 1.34                      |
|                 | Max.       | 121.5    | 35.2       | 142.5   | 94     | 18.5    | 5.30                      |
|                 | Min.       | 12.0     | 4.8        | 6.5     | 40     | 0.8     | 0.12                      |
| PICO<br>(n=29)  | Mean       | 31.9     | 15.1       | 8.2     | 74     | 3.6     | 1.74                      |
|                 | s.d.       | 18.8     | 7.1        | 3.4     | 12     | 2.4     | 1.08                      |
|                 | Max.       | 74.8     | 28.8       | 16.5    | 91     | 11.7    | 4.18                      |
|                 | Min.       | 10.8     | 6.2        | 3.0     | 48     | 1.2     | 0.14                      |
| PIJE<br>(n=30)  | Mean       | 44.4     | 17.8       | 31.9    | 69     | 6.1     | 2.58                      |
|                 | s.d.       | 32.1     | 10.8       | 21.5    | 15     | 5.5     | 1.90                      |
|                 | Max.       | 131.9    | 44.8       | 94.0    | 94     | 22.7    | 7.62                      |
|                 | Min.       | 12.1     | 4.6        | 8.5     | 18     | 0.3     | 0.24                      |
| PILA<br>(n=23)  | Mean       | 67.9     | 29.0       | 39.2    | 55     | 13.9    | 1.92                      |
|                 | s.d.       | 40.2     | 13.6       | 19.2    | 13     | 8.2     | 0.96                      |
|                 | Max.       | 159.8    | 53.3       | 88.5    | 81     | 27.2    | 3.64                      |
|                 | Min.       | 10.5     | 5.9        | 8.5     | 33     | 1.8     | 0.24                      |
| PIMO<br>(n=29)  | Mean       | 52.1     | 21.4       | 18.0    | 71     | 6.6     | 1.42                      |
|                 | s.d.       | 32.6     | 12.3       | 8.6     | 19     | 7.0     | 0.62                      |
|                 | Max.       | 129.9    | 45.0       | 49.5    | 91     | 28.0    | 2.82                      |
|                 | Min.       | 10.5     | 4.6        | 5.5     | 15     | 0.6     | 0.28                      |
| PSME<br>(n=30)  | Mean       | 52.8     | 24.5       | 32.9    | 77     | 6.0     | 2.54                      |
|                 | s.d.       | 46.1     | 13.0       | 30.9    | 11     | 5.2     | 1.24                      |

|      |       |      |       |    |      |      |
|------|-------|------|-------|----|------|------|
| Max. | 201.0 | 56.7 | 113.5 | 92 | 27.2 | 5.68 |
| Min. | 16.3  | 9.6  | 7.5   | 45 | 1.2  | 0.74 |

---

**Table S2.** Summary data for DBH and bark thickness (BT) in independent dataset collected in mixed-conifer stands at the Stanislaus-Tuolumne Experimental Forest (STEF) site. Species sampled: white fir (ABCO), incense-cedar (CADE), Jeffrey pine (PIJE), and sugar pine (PILA).

| <b>Species</b>  | <b>Statistics</b> | <b>DBH (cm)</b> | <b>BT (mm)</b> |
|-----------------|-------------------|-----------------|----------------|
| ABCO<br>(n=365) | Mean              | 31.6            | 22.2           |
|                 | s.d.              | 26.8            | 18.3           |
|                 | Max.              | 125.7           | 87.0           |
|                 | Min.              | 5.0             | 2.0            |
| CADE<br>(n=221) | Mean              | 39.1            | 36.9           |
|                 | s.d.              | 34.7            | 33.6           |
|                 | Max.              | 151.4           | 145.0          |
|                 | Min.              | 4.0             | 2.0            |
| PIJE<br>(n=51)  | Mean              | 51.9            | 40.4           |
|                 | s.d.              | 37.6            | 23.6           |
|                 | Max.              | 156.7           | 81.0           |
|                 | Min.              | 6.4             | 3.0            |
| PILA<br>(n=189) | Mean              | 79.5            | 53.6           |
|                 | s.d.              | 43.2            | 24.9           |
|                 | Max.              | 175.6           | 138.0          |
|                 | Min.              | 5.8             | 1.0            |

**Table S3.** Bark thickness (BT) models for mixed-conifer forest type, fitted to data for Klamath, Tahoe, and Sequoia National Forests. Models including tree DBH (cm) were developed with and without measures for growth (GR; mm yr<sup>-1</sup>) or vigor (crown ratio; CR). A second-order correction on the Akaike information criterion ranked model performance (best model AICc shown in bold). Models predict the square root of bark thickness (mm). Species sampled: white fir (ABCO), red fir (ABMA), incense-cedar (CADE), lodgepole pine (PICO), Jeffrey pine (PIJE), sugar pine (PILA), western white pine (PIMO), and Douglas-fir (PSME).

| Data                    | Model fit                                                                      | Parameters                                                              | Coefficients             | s.e.                    | d.f. | t                       | Pr> t                            | RMSE  |
|-------------------------|--------------------------------------------------------------------------------|-------------------------------------------------------------------------|--------------------------|-------------------------|------|-------------------------|----------------------------------|-------|
| <i>Nonlinear Models</i> |                                                                                |                                                                         |                          |                         |      |                         |                                  |       |
| ABCO<br>(n=132)         | <b>AICc= 219.815</b><br>$\sqrt{BT} = a * \sqrt{DBH}^b$                         | <i>a</i><br><i>b</i> <sub>1</sub>                                       | 1.002<br>0.869           | 0.056<br>0.028          | 130  | 17.83<br>31.05          | < 0.0001<br>< 0.0001             | 6.28  |
| ABCO<br>(n=132)         | <b>AICc= 211.873</b><br>$\sqrt{BT} = (a * \sqrt{DBH}^{b_1}) * \sqrt{GR}^{b_2}$ | <i>a</i><br><i>b</i> <sub>1</sub><br><i>b</i> <sub>2</sub>              | 1.231<br>0.951<br>-0.078 | 0.101<br>0.037<br>0.024 | 129  | 12.19<br>25.87<br>-3.25 | < 0.0001<br>< 0.0001<br>0.0015   | 6.05  |
| ABMA<br>(n=138)         | <b>AICc= 254.888</b><br>$\sqrt{BT} = a * \sqrt{DBH}^b$                         | <i>a</i><br><i>b</i> <sub>1</sub>                                       | 0.886<br>0.919           | 0.060<br>0.034          | 136  | 14.86<br>27.27          | < 0.0001<br>< 0.0001             | 6.87  |
| ABMA<br>(n=138)         | <b>AICc= 237.544</b><br>$\sqrt{BT} = (a * \sqrt{DBH}^{b_1}) * \sqrt{GR}^{b_2}$ | <i>a</i><br><i>b</i> <sub>1</sub><br><i>b</i> <sub>2</sub>              | 1.214<br>1.042<br>-0.116 | 0.113<br>0.041<br>0.026 | 135  | 10.73<br>25.29<br>-4.51 | < 0.0001<br>< 0.0001<br>< 0.0001 | 6.38  |
| PIJE<br>(n=30)          | <b>AICc= 44.774</b><br>$\sqrt{BT} = a * \sqrt{DBH}^b$                          | <i>a</i><br><i>b</i> <sub>1</sub>                                       | 1.048<br>0.892           | 0.098<br>0.047          | 28   | 10.66<br>19.20          | < 0.0001<br>< 0.0001             | 6.32  |
| PIJE<br>(n=30)          | <b>AICc= 39.851</b><br>$\sqrt{BT} = (a * \sqrt{DBH}^{b_1}) * \sqrt{GR}^{b_2}$  | <i>a</i><br><i>b</i> <sub>1</sub><br><i>b</i> <sub>2</sub>              | 1.538<br>0.945<br>-0.106 | 0.242<br>0.045<br>0.037 | 27   | 6.36<br>20.84<br>-2.83  | < 0.0001<br>< 0.0001<br>0.0087   | 5.67  |
| PICO<br>(n=29)          | <b>AICc= 7.282</b><br>$\sqrt{BT} = a * \sqrt{DBH}^b$                           | <i>a</i><br><i>b</i> <sub>1</sub>                                       | 1.027<br>0.603           | 0.104<br>0.057          | 27   | 9.92<br>10.61           | < 0.0001<br>< 0.0001             | 1.49  |
| PICO<br>(n=29)          | <b>AICc= 1.899</b><br>$\sqrt{BT} = (a * \sqrt{DBH}^{b_1}) * CR^{b_2}$          | <i>a</i><br><i>b</i> <sub>1</sub><br><i>b</i> <sub>2</sub>              | 1.192<br>0.562<br>0.261  | 0.125<br>0.053<br>0.093 | 26   | 9.56<br>10.62<br>2.81   | < 0.0001<br>< 0.0001<br>0.0094   | 1.25  |
| PILA<br>(n=23)          | <b>AICc= 40.449</b><br>$\sqrt{BT} = a * \sqrt{DBH}^b$                          | <i>a</i><br><i>b</i> <sub>1</sub>                                       | 1.325<br>0.743           | 0.176<br>0.061          | 21   | 7.53<br>12.16           | < 0.0001<br>< 0.0001             | 6.93  |
| PILA<br>(n=23)          | <b>AICc= 42.101</b><br>$\sqrt{BT} = (a * \sqrt{DBH}^{b_1}) * CR^{b_2}$         | <i>a</i><br><i>b</i> <sub>1</sub><br><i>b</i> <sub>2</sub>              | 1.343<br>0.765<br>0.093  | 0.178<br>0.064<br>0.086 | 20   | 7.53<br>11.95<br>1.08   | < 0.0001<br>< 0.0001<br>0.2920   | 6.67  |
| PIMO<br>(n=29)          | <b>AICc= 37.195</b><br>$\sqrt{BT} = a * \sqrt{DBH}^b$                          | <i>a</i><br><i>b</i> <sub>1</sub>                                       | 1.299<br>0.609           | 0.156<br>0.059          | 27   | 8.30<br>10.24           | < 0.0001<br>< 0.0001             | 4.24  |
| PIMO<br>(n=29)          | <b>AICc= 39.888</b><br>$\sqrt{BT} = (a * \sqrt{DBH}^{b_1}) * CR^{b_2}$         | <i>a</i><br><i>b</i> <sub>1</sub><br><i>b</i> <sub>2</sub>              | 1.301<br>0.609<br>0.006  | 0.161<br>0.061<br>0.053 | 26   | 8.06<br>10.05<br>0.11   | < 0.0001<br>< 0.0001<br>0.9100   | 4.24  |
| <i>Linear Models</i>    |                                                                                |                                                                         |                          |                         |      |                         |                                  |       |
| PSME<br>(n=30)          | <b>AICc= 56.634</b><br>$\sqrt{BT} = a * \sqrt{DBH}$                            | <i>a</i>                                                                | 0.785                    | 0.015                   | 29   | 53.18                   | < 0.0001                         | 7.16  |
| PSME<br>(n=30)          | <b>AICc= 56.370</b><br>$\sqrt{BT} = b_0 + b_1\sqrt{DBH} + b_2CR$               | <i>b</i> <sub>0</sub><br><i>b</i> <sub>1</sub><br><i>b</i> <sub>2</sub> | -1.453<br>0.867<br>1.065 | 0.851<br>0.039<br>0.957 | 27   | -1.71<br>22.12<br>1.11  | 0.0991<br>< 0.0001<br>0.2754     | 6.42  |
| CADE<br>(n=45)          | <b>AICc=111.319</b><br>$\sqrt{BT} = a * \sqrt{DBH}$                            | <i>a</i>                                                                | 0.891                    | 0.017                   | 44   | 50.98                   | < 0.0001                         | 12.08 |
| CADE                    | <b>AICc=112.356</b>                                                            | <i>b</i> <sub>0</sub>                                                   | -0.517                   | 0.368                   | 42   | -1.403                  | 0.1680                           | 11.55 |

|        |                                                  |       |        |       |        |          |
|--------|--------------------------------------------------|-------|--------|-------|--------|----------|
| (n=45) | $\sqrt{BT} = b_0 + b_1\sqrt{DBH} + b_2\sqrt{GR}$ | $b_1$ | 1.031  | 0.076 | 13.619 | < 0.0001 |
|        |                                                  | $b_2$ | -0.005 | 0.003 | -1.417 | 0.1640   |

**Table S4.** Comparison of bark thickness (BT) models with DBH (cm) and models including DBH and DBH growth (GR; mm yr<sup>-1</sup>) or vigor (crown ratio; CR) for Klamath, Tahoe, and Sequoia National Forests. AICc values were calculated using a second-order bias correction to correct for small sample size. Log Likelihood reflects the probability of the data given the model, while K represents the relative number of sample parameters for each model respectively. Species sampled: white fir (ABCO), red fir (ABMA), incense-cedar (CADE), lodgepole pine (PICO), Jeffrey pine (PIJE), sugar pine (PILA), western white pine (PIMO), and Douglas-fir (PSME).

| Species           | Model                                                  | AICc  | ΔAIC | Log Likelihood | K |
|-------------------|--------------------------------------------------------|-------|------|----------------|---|
| ABCO<br>(n = 132) | $\sqrt{BT} = a * \sqrt{DBH}^b$                         | 219.8 | 7.9  | -106.8         | 1 |
|                   | $\sqrt{BT} = (a * \sqrt{DBH}^{b_1}) * \sqrt{GR}^{b_2}$ | 211.9 |      | -101.8         | 2 |
| ABMA<br>(n = 138) | $\sqrt{BT} = a * \sqrt{DBH}^b$                         | 254.9 | 17.4 | -124.4         | 1 |
|                   | $\sqrt{BT} = (a * \sqrt{DBH}^{b_1}) * \sqrt{GR}^{b_2}$ | 237.5 |      | -114.6         | 2 |
| PIJE<br>(n = 30)  | $\sqrt{BT} = a * \sqrt{DBH}^b$                         | 44.8  | 4.9  | -18.9          | 1 |
|                   | $\sqrt{BT} = (a * \sqrt{DBH}^{b_1}) * \sqrt{GR}^{b_2}$ | 39.9  |      | -15.1          | 2 |
| PICO<br>(n = 29)  | $\sqrt{BT} = a * \sqrt{DBH}^b$                         | 7.3   | 5.4  | -0.2           | 1 |
|                   | $\sqrt{BT} = (a * \sqrt{DBH}^{b_1}) * CR^{b_2}$        | 1.9   |      | 3.9            | 2 |
| PILA<br>(n = 23)  | $\sqrt{BT} = a * \sqrt{DBH}^b$                         | 40.4  | 1.7  | -16.6          | 1 |
|                   | $\sqrt{BT} = (a * \sqrt{DBH}^{b_1}) * CR^{b_2}$        | 42.1  |      | -15.9          | 2 |
| PIMO<br>(n = 29)  | $\sqrt{BT} = a * \sqrt{DBH}^b$                         | 37.2  | 2.7  | -15.1          | 1 |
|                   | $\sqrt{BT} = (a * \sqrt{DBH}^{b_1}) * CR^{b_2}$        | 39.9  |      | -15.1          | 2 |
| PSME<br>(n = 30)  | $\sqrt{BT} = a * \sqrt{DBH}$                           | 56.6  | 0.2  | -23.1          | 1 |
|                   | $\sqrt{BT} = b_0 + b_1\sqrt{DBH} + b_2CR$              | 56.4  |      | -23.4          | 2 |
| CADE<br>(n = 45)  | $\sqrt{BT} = a * \sqrt{DBH}$                           | 111.3 | 1.1  | -53.5          | 1 |
|                   | $\sqrt{BT} = b_0 + b_1\sqrt{DBH} + b_2\sqrt{GR}$       | 112.4 |      | -51.7          | 2 |
